# Supplementary material
Source: PubMed Central journal article supplement (PMC6790762)
Supplement: rspb20191845supp1.pdf [file rspb20191845supp1.pdf]

## Supplementary Material

### **Intergenerational effects on offspring telomere length; interactions among maternal age, stress exposure and offspring sex**

Valeria Marasco<sup>1,2</sup>, Winnie Boner<sup>2</sup>, Kate Griffiths<sup>2</sup>, Britt Heidinger<sup>2,3</sup>, and Pat Monaghan<sup>2\*</sup>

*<sup>1</sup>Konrad Lorenz Institute of Ethology, Department of Interdisciplinary Life Sciences, University of Veterinary Medicine Vienna, Savoyenstraße 1a, A-1160, Vienna, Austria*

*<sup>2</sup>Institute of Biodiversity, Animal Health and Comparative Medicine, Graham Kerr Building, University of Glasgow, Glasgow, G12 8QQ, UK*

*<sup>3</sup>Biological Sciences Department, Stevens Hall, North Dakota State University, Fargo, ND 58108, USA*

\*Corresponding author: Pat.Monaghan@glasgow.ac.uk

**Table S1.** GLMM modelling with Gaussian distribution to test whether prior maternal reproductive effort ((a) total number of eggs laid, or (b) total number of chicks reared up to the first three breeding events prior the old-mother breeding event at 3.5 years of age), maternal treatment, fathers' age at reproduction, and other selected fixed parameters (see "Data Analysis", Material and Methods) influenced early life telomere length (measured at ~ 30 days of age, values ln-transformed) in the offspring produced during the old-mother breeding event; female identity was added as random factor; \*indicates non-significant factor removed from the model ( $p > 0.05$ ). Number of offspring: 126; number of mothers: 52.

(a)

| Parameter                                       | Estimate | SE      | df      | t      | p     |
|-------------------------------------------------|----------|---------|---------|--------|-------|
| Female ring identity (r)                        | 0.021    |         |         |        |       |
| Residual                                        | 0.153    |         |         |        |       |
| Intercept                                       | -0.491   | 0.305   | 48.240  | -1.611 | 0.114 |
| Maternal treatment<br>(Challenging environment) | 0.041    | 0.096   | 39.580  | 0.428  | 0.671 |
| Father age at reproduction                      | <0.0001  | <0.0001 | 41.330  | 0.196  | 0.846 |
| Replicate (2)                                   | -0.046   | 0.100   | 43.060  | -0.457 | 0.650 |
| Hatching order                                  | <0.0001  | 0.031   | 115.200 | 0.003  | 0.998 |
| Sex (Male)                                      | 0.061    | 0.075   | 118.700 | 0.810  | 0.420 |
| Prior maternal egg laying effort                | 0.003    | 0.019   | 41.750  | 0.154  | 0.878 |
| Offspring Body mass*                            |          |         |         |        | 0.9   |

(b)

| Parameter                                       | Estimate | SE      | df      | t      | p     |
|-------------------------------------------------|----------|---------|---------|--------|-------|
| Female ring identity (r)                        | 0.021    |         |         |        |       |
| Residual                                        | 0.153    |         |         |        |       |
| Intercept                                       | -0.396   | 0.207   | 58.690  | -1.918 | 0.060 |
| Maternal treatment<br>(Challenging environment) | 0.024    | 0.095   | 39.480  | 0.257  | 0.798 |
| Father age at reproduction                      | <0.0001  | <0.0001 | 40.330  | 0.259  | 0.797 |
| Replicate (2)                                   | -0.049   | 0.098   | 42.830  | -0.497 | 0.622 |
| Hatching order                                  | 0.003    | 0.031   | 116.100 | 0.083  | 0.934 |
| Offspring sex (Male)                            | 0.056    | 0.076   | 118.600 | 0.747  | 0.457 |
| Prior maternal chick rearing effort             | -0.011   | 0.021   | 44.800  | -0.527 | 0.601 |
| Offspring Body mass*                            |          |         |         |        | 0.9   |

**Table S2.** (a) GLMM modelling with a Gaussian distribution to test the effects of maternal age (young or old, 6 month or 3.5 years of age respectively), maternal treatment (control environment or challenging environment), offspring sex, and selected fixed parameters (see “Data Analysis”, Material and Methods) on offspring body mass at nutritional independence (~ 30 days of age); female identity was added as random factor. Fixed factor estimates are indicated in parenthesis; r indicates random factor and its associated variance. The non-significant interactions ( $*p > 0.05$ ) were removed from the final model, significant factors are in bold. In (b) the same model as in (a) was performed using only the data from offspring produced by experimental females that bred at both breeding events.

(a)

| Parameter                                          | Estimate      | SE           | df             | t             | p                 |
|----------------------------------------------------|---------------|--------------|----------------|---------------|-------------------|
| Female ring identity (r)                           | 0.631         |              |                |               |                   |
| Residual                                           | 0.942         |              |                |               |                   |
| <b>Intercept</b>                                   | <b>15.232</b> | <b>0.234</b> | <b>337.464</b> | <b>65.072</b> | <b>&lt;0.0001</b> |
| <b>Maternal age (old)</b>                          | <b>-0.420</b> | <b>0.131</b> | <b>415.380</b> | <b>-3.199</b> | <b>0.001</b>      |
| Maternal treatment (Challenging environment)       | -0.176        | 0.155        | 173.151        | -1.130        | 0.260             |
| Replicate (2)                                      | -0.156        | 0.158        | 174.240        | -0.987        | 0.325             |
| Hatching order                                     | -0.023        | 0.050        | 324.012        | -0.459        | 0.647             |
| Offspring sex (Male)                               | -0.148        | 0.104        | 345.678        | -1.422        | 0.156             |
| <b>Brood size</b>                                  | <b>-0.204</b> | <b>0.060</b> | <b>420.947</b> | <b>-3.399</b> | <b>0.001</b>      |
| Maternal treatment x Offspring sex*                |               |              |                |               | 0.8               |
| Maternal treatment x Maternal age*                 |               |              |                |               | 0.1               |
| Maternal age x Offspring sex*                      |               |              |                |               | 1.0               |
| Maternal treatment x Maternal age x Offspring sex* |               |              |                |               | 0.5               |

(b)

| Parameter                                          | Estimate      | SE           | df            | t             | p                 |
|----------------------------------------------------|---------------|--------------|---------------|---------------|-------------------|
| Female ring identity (r)                           | 0.528         |              |               |               |                   |
| Residual                                           | 1.052         |              |               |               |                   |
| <b>Intercept</b>                                   | <b>14.475</b> | <b>0.449</b> | <b>95.708</b> | <b>32.206</b> | <b>&lt;0.0001</b> |
| Maternal age (old)                                 | -0.120        | 0.161        | 147.352       | -0.750        | 0.455             |
| Maternal treatment (Challenging environment)       | -0.174        | 0.288        | 40.693        | -0.602        | 0.551             |
| Replicate (2)                                      | 0.098         | 0.304        | 40.796        | 0.320         | 0.750             |
| Hatching order                                     | -0.017        | 0.078        | 146.588       | -0.225        | 0.822             |
| Offspring sex (Male)                               | -0.072        | 0.162        | 150.828       | -0.443        | 0.659             |
| Brood size                                         | -0.137        | 0.085        | 176.518       | -1.598        | 0.112             |
| Maternal treatment x Offspring sex*                |               |              |               |               | 0.3               |
| Maternal treatment x Maternal age*                 |               |              |               |               | 0.1               |
| Maternal age x Offspring sex*                      |               |              |               |               | 0.8               |
| Maternal treatment x Maternal age x Offspring sex* |               |              |               |               | 0.5               |

**Table S3.** (a) GLMM modelling with a Gaussian distribution to test the effects of maternal age (young or old, 6 month or 3.5 years of age respectively), maternal treatment (control environment or challenging environment), offspring sex, and selected fixed parameters (see “Data Analysis”, Material and Methods) on offspring telomere length measured at ~ 30 days of age (ln-transformed values); female identity was added as random factor. Fixed factor estimates are indicated in parenthesis; r indicates random factor and its associated variance. The non-significant factors ( $*p > 0.05$ ) were removed from the final model; significant factors are in bold. In (b) the same model as in (a) was performed using only the data from offspring produced by experimental females that bred at both breeding events.

(a)

| Parameter                                                | Estimate      | SE           | df             | t             | p                 |
|----------------------------------------------------------|---------------|--------------|----------------|---------------|-------------------|
| Female ring identity (r)                                 | 0.006         |              |                |               |                   |
| Residual                                                 | 0.202         |              |                |               |                   |
| <b>Intercept</b>                                         | <b>0.203</b>  | <b>0.085</b> | <b>358.831</b> | <b>2.401</b>  | <b>0.017</b>      |
| <b>Maternal age (old)</b>                                | <b>-0.481</b> | <b>0.116</b> | <b>392.819</b> | <b>-4.145</b> | <b>&lt;0.0001</b> |
| Maternal treatment (Challenging environment)             | -0.063        | 0.073        | 407.101        | -0.872        | 0.384             |
| Replicate (2)                                            | -0.0814       | 0.0468       | 179.522        | -1.740        | 0.084             |
| Hatching order                                           | -0.013        | 0.022        | 402.148        | -0.613        | 0.540             |
| Offspring sex (Male)                                     | 0.068         | 0.071        | 415.943        | 0.952         | 0.342             |
| Brood size                                               | -0.010        | 0.022        | 361.482        | -0.444        | 0.657             |
| <b>Maternal treatment x Offspring sex</b>                | <b>-0.262</b> | <b>0.103</b> | <b>418.401</b> | <b>-2.545</b> | <b>0.011</b>      |
| Maternal treatment x Maternal age                        | -0.026        | 0.150        | 402.226        | -0.175        | 0.861             |
| Maternal age x Offspring sex                             | -0.130        | 0.152        | 424.265        | -0.857        | 0.392             |
| <b>Maternal treatment x Maternal age x Offspring sex</b> | <b>0.461</b>  | <b>0.199</b> | <b>430.575</b> | <b>2.311</b>  | <b>0.021</b>      |

(b)

| Parameter                                                | Estimate      | SE           | df             | t             | p            |
|----------------------------------------------------------|---------------|--------------|----------------|---------------|--------------|
| Female ring identity (r)                                 | 0.012         |              |                |               |              |
| Residual                                                 | 0.153         |              |                |               |              |
| Intercept                                                | 0.223         | 0.157        | 151.372        | 1.421         | 0.157        |
| <b>Maternal age (old)</b>                                | <b>-0.358</b> | <b>0.142</b> | <b>164.605</b> | <b>-2.515</b> | <b>0.013</b> |
| Maternal treatment (Challenging environment)             | 0.038         | 0.145        | 169.338        | 0.265         | 0.791        |
| Replicate (2)                                            | -0.1547       | 0.0774       | 46.969         | -1.998        | 0.051        |
| Hatching order                                           | -0.016        | 0.029        | 161.353        | -0.563        | 0.574        |
| Offspring sex (Male)                                     | 0.246         | 0.144        | 166.811        | 1.700         | 0.091        |
| Brood size                                               | -0.028        | 0.029        | 163.263        | -0.960        | 0.339        |
| <b>Maternal treatment x Offspring sex</b>                | <b>-0.473</b> | <b>0.186</b> | <b>167.086</b> | <b>-2.541</b> | <b>0.012</b> |
| Maternal treatment x Maternal age                        | -0.153        | 0.183        | 166.252        | -0.837        | 0.404        |
| Maternal age x Offspring sex                             | -0.348        | 0.191        | 173.492        | -1.816        | 0.071        |
| <b>Maternal treatment x Maternal age x Offspring sex</b> | <b>0.648</b>  | <b>0.249</b> | <b>173.256</b> | <b>2.606</b>  | <b>0.010</b> |

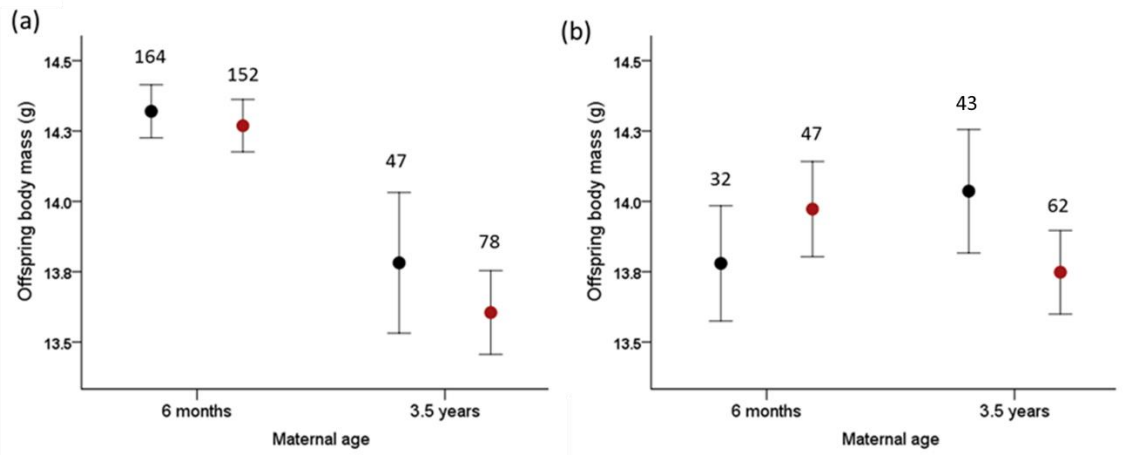

**Figure S1.** (a) Body mass at nutritional independence (~30 days old) of zebra finch offspring produced by mothers that bred during the young-mother breeding event at 6 months of age (89 control and 83 challenged mothers) and/or during the old-mother breeding event at 3.5 years of age (20 control and 32 challenged mothers). In (b) data are shown only from the subset of females that produced offspring during both the young- and old-mother breeding event (18 control and 26 challenged mothers). Data are shown as means  $\pm$  SE; black circles indicates offspring produced by control mothers and red circles indicates offspring produced by challenged mothers, numbers indicates offspring sample sizes separately by maternal treatment and maternal age.
